# Supplementary material
Source: Springer Nature journal article supplement (https://www.springermedizin.de/resource/supplementary/12865_2005_81_MOESM1_ESM.pdf/9428468)
Supplement: MOESM1 [file 9428468]

OT-1 Forward Primer

151 ACGIGTATTCCCATCTCTGGACATAGCAATGTGGTCTGGTACCAGCAGAC 

201 TCTGGGGGAAGGAATTAAGTTCCTTATTTCAGCATTATGAAAAGGTGGAGA

251 GAGACAAAGGATTCTACCCAGCAGATTCTCAGTCCACASTTTGATGAC

OT-1 Hybridization Probe

301 TATCACTCTGAAATGAACATGAGTGGCCTGGGACTGGAGGACTCTGCTAT

OT-1 Reverse Primer

351 GTACTCTGTGCCAGCTCTC  ~~GGCCGAAATGAGTGGGAGGACTCTGCTAT~~

401 ~~GGCCGAAATGAGTGGGAGGACTCTGCTAT~~ CACGTTTTAGAGGATCTGAGAAATGTGACTCCACCCAAAG

TACTCTGTGCCAGCTCTC = Vps.2

GGCCGAAAT = D1.8

TATCACTCTGAAATGAACATGAGTGGCCTGGGACTGGAGGACTCTGCTAT = Jp2.8
